# Mobile Phones and Multiple Sclerosis – A Nationwide Cohort Study in Denmark

Aslak Harbo Poulsen<sup>1\*</sup>, Egon Stenager<sup>2,5,6</sup>, Christoffer Johansen<sup>1</sup>, Joan Bentzen<sup>3</sup>, Søren Friis<sup>1</sup>, Joachim Schüz<sup>4</sup>

**1** Institute of Cancer Epidemiology, Danish Cancer Society, Copenhagen, Denmark, **2** The Danish MS Registry, Copenhagen University Hospital, Copenhagen, Denmark, **3** National Institute of Public Health, University of Southern Denmark, Copenhagen, Denmark, **4** International Agency for Research on Cancer (IARC), Section of Environment and Radiation, Lyon, France, **5** Institute of Regional Health Services, University of Southern Denmark, Odense, Denmark, **6** MS Clinic of Southern Jutland (Sønderborg, Vejle, Esbjerg), Sønderborg Hospital, Sønderborg, Denmark

## Abstract

We investigated the risk of, prognosis of and symptoms of multiple sclerosis (MS) among all Danish residents who owned a mobile phone subscription before 1996. Using the Danish Multiple Sclerosis Registry and Civil Registration System, study subjects were followed up for MS through 2004. Poisson models were used to calculate incidence rate ratios (IRR, age range: 18–64 years) and mortality rate ratios (MRR, age range: 18+) and to compare presenting symptoms among subscribers and all non-subscribers. A total of 405 971 subscription holders accrued four million years of follow up, with men accounting for 86% of the observation time. Among subscription holding men, the IRR of MS was close to unity, overall as well as 13+ years after first subscription (IRR 1.02, 95% CI: 0.48–2.16). Among women, the IRR was 3.43 (95% CI: 0.86–13.72) 13+ years after first subscription, however, based on only two cases. Presenting symptoms of MS differed between subscribers and non-subscribers ( $p = 0.03$ ), with slightly increased risk of diplopia in both genders (IRR: 1.38, 95% CI: 1.02–1.86), an increased risk of fatigue among women (IRR: 3.02, 95% CI: 1.45–6.28), and of optic neuritis among men (IRR: 1.38, 95% CI: 1.03–1.86). Overall the MRR was close to one (MRR: 0.91, 95% CI: 0.70–1.19) among MS-patients with a subscription and although we observed some increased MRR estimates among women, these were based on small numbers. In conclusion, we found little evidence for a pronounced association between mobile phone use and risk of MS or mortality rate among MS patients. Symptoms of MS differed between subscribers and nonsubscribers for symptoms previously suggested to be associated with mobile phone use. This deserves further attention, as does the increased long-term risk of MS among female subscribers, although small numbers and lack of consistency between genders prevent causal interpretation.

**Citation:** Harbo Poulsen A, Stenager E, Johansen C, Bentzen J, Friis S, et al. (2012) Mobile Phones and Multiple Sclerosis – A Nationwide Cohort Study in Denmark. PLoS ONE 7(4): e34453. doi:10.1371/journal.pone.0034453

**Editor:** Jun-ichi Kira, Kyushu University, Japan

**Received:** December 12, 2011; **Accepted:** February 28, 2012; **Published:** April 30, 2012

**Copyright:** © 2012 Harbo Poulsen et al. This is an open-access article distributed under the terms of the Creative Commons Attribution License, which permits unrestricted use, distribution, and reproduction in any medium, provided the original author and source are credited.

**Funding:** AHP was supported by a stipend for PhD students from the Danish Graduate School in Public Health Science. All other authors contributed to this work based on their respective core budget positions. The establishment of the original cohort of subscription holders was supported by Sonofon and TeleDenmark Mobile. The Danish MS Registry is funded by the Danish Multiple Sclerosis Society. The funders had no role in study design, data collection and analysis, decision to publish, or preparation of the manuscript.

**Competing Interests:** Since 1994, CJ has been a Consultant to the Danish National Board of Health in the area electromagnetic fields and health and received support from Sonofon and TeleDenmark Mobile for the establishment of the nationwide cohort in 1999. ES has received financial support for congress participation from Bayer Schering, Merck Serono, Biogen Idec, Sanofi Aventis and Novartis and unrestricted research grants from Bayer Schering, Merck Serono, and Biogen Idec. There are no patents, products in development or marketed products to declare. This does not alter the authors' adherence to all the PLoS ONE policies on sharing data and materials, as detailed online in the guide for authors.

\* E-mail: Aslak@Cancer.DK

## Introduction

Usage of mobile phones has changed dramatically in the last two decades, with steeply increasing number of users and decreasing age at first use. The radiofrequency electromagnetic fields (RF-EMF) emitted from mobile phones held to the head penetrates up to six cm into the brain [1,2] and there remains concern about potential adverse health effects. Epidemiological studies have largely been on a potential risk of neoplasms, particularly of the brain, and a working group at the International Agency for Research on Cancer (IARC) has recently classified RF-EMF as possibly carcinogenic [3]. For other diseases of the central nervous system (CNS) and head, very few results are available. One of the most frequent CNS diseases is multiple sclerosis (MS), characterized by progressive demyelination of the axons of the CNS causing a wide range of neurological symptoms. MS is

typically diagnosed in persons in their thirties. Only symptomatic treatment is available, but survival is good [4], making MS a leading cause of disability in younger adults in the developed world [5]. In Denmark, the prevalence of MS in 2005 was 154.5 per 100 000 [6]. There are few established risk factors for MS, but leakage across the blood brain barrier is prominent in the pathophysiology of the disease. Therefore, it is of interest that a Swedish research group has observed leakage of the blood brain barrier in rats exposed to 900 MHz field from a GSM phone [7–10]. Attempts to replicate these findings have, however, failed and the overall evidence remains controversial [11–14]. Notwithstanding this, the results may have caused concern in MS patients as to whether mobile phones have an impact on their disease. A recent nationwide Danish cohort study examined the association between mobile phone use and risk of various CNS diseases based on information on mobile phone subscription status prior to 1996

[15]. The study found no increased risk of MS overall or in mobile phone subscribers with 10 or more years of subscription. Information on MS was, however, obtained from the Danish National Patient Register [16], which only provides few details on each specific case and thus is prone to disease misclassification [17] and underreporting, especially on date of diagnosis. The present population-based epidemiologic study used the same cohort but with information on MS from the Danish Multiple Sclerosis Registry [18], which provides more precise case identification and allows analysis of the influence of exposure status on the symptoms and course of the disease. To our knowledge, this is the first study examining the long term effects of mobile phone use on risk and prognosis of MS.

## Methods

### Ethics Statement

The study was approved by the Danish ethical committee system (KF 01–075/96), the Danish Data Protection Board (1996–1200–121, 2009–41–3886), and the Danish Ministry of Justice (Jnr. 1996–760–0219). In accordance with Danish law informed consent was not obtained as the study was entirely register-based and did not involve biological samples from, or contact with study participants.

### Study Population

We conducted this study within the population of Denmark during the period 1987–2004. All Danish citizens are assigned a unique personal identification number at birth by the Danish Central Population Registry (CPR), which keeps complete information about the date of birth, gender, vital status, migration and current and former addresses of all Danes [19]. This identification number is applied universally in all contacts within the health care systems in Denmark allowing individuals to be tracked over time in and across all Danish administrative and health registers.

### Ascertainment of MS Cases

MS cases were identified from the Danish Multiple Sclerosis Registry [18,20] established in 1956. The register contains information on more than 90% of all MS patients in Denmark since 1949 and is considered to have a validity of 94%. For each patient the medical records have been evaluated and the year of the first symptom has been assessed. Furthermore, the first symptom(s) for each patient in the register are recorded, and multiple simultaneous symptoms are allowed. For the present paper, only definite and probable diagnoses according to the Poser criteria [21] were included.

### Exposure Assessment

Records of all (723 421) mobile phone subscriptions in Denmark during the period 1982 (when this service was established) until the end of 1995 were obtained from the Danish network operators. Details of the cleaning process of these data has been reported previously [15,22–24]: Briefly, 200 507 corporate subscriptions were deleted and 102 828 records were deleted for other reasons including errors in matching variables and duplicate records (persons with multiple subscriptions) leaving a cohort of 420 086 private mobile phone subscription holders. Since handheld mobile phones first became available in Denmark in 1987, all subscription periods were left truncated to 1 January 1987, further deleting four persons from the dataset. The unexposed population was obtained by subtracting the number of MS-cases and exposed persons from the Danish population count by age and gender for each year of

the study. Only persons, who turned 18 years before January 1<sup>st</sup> 1996, i.e., end of exposure period, were included in the analysis.

### Risk of MS Among Subscription Holders

In analyses of risk of MS and presenting symptoms among mobile phone subscription holders, symptom free subjects entered the study population on 1 January 1987 or age 18 years, whichever occurred latest. Follow-up ended at date of MS diagnosis, age 65 years, death, emigration from Denmark or 31 December 2004, whichever came first. Exposed person time was further categorized based on duration of follow-up since date of first subscription (<1, 1–3, 4–6, 7–9, 10–12, 13+ years). In a subanalysis, we used July 1<sup>st</sup> in the year of the first recorded symptom(s) as endpoint. Due to the retrospective nature of debut data follow-up was, for this analysis, terminated on 31 December 2000 allowing four years until 2004 to identify patients with first symptoms in 2000 or earlier. In these analyses, we excluded 13 573 subscription holders who obtained their subscription after age 65 years, 30 with MS symptoms before age 18 years, 366 with symptoms before 1987 and 142 diagnosed with MS before getting a subscription, yielding a population of 405 971 mobile phone subscription holders.

### Risk of Death Among MS-patients

In analyses of risk of death among MS patients using mobile phone, MS patients diagnosed between age 18 and 65 years in 1980 or later entered the study population at date of diagnosis or 1 January 1987, whichever came latest. Follow-up ended at date of death, emigration from Denmark or on 31 December 2004, whichever came first. A total of 7420 MS-patients met the inclusion criteria, of whom 717 were subscription holders. For these patients, exposed person-years were cumulated from date of diagnosis or date of subscribing, whichever came last, and subdivided into five categories (<1, 1–3, 4–6, 7–9, 10+ years).

### Likelihood of Subscribing for a Mobile Phone Among MS Patients

To evaluate a potentially reverse association, we analysed MS as an explanatory factor for obtaining a subscription in the 5 050 MS patients with a first symptom between age 18 and 65 years in the period 1980 to 1995. Entry and exit criteria were as for the main analysis, except that subjects were censored at the date of subscription acquisition, or on 31 December 1995, and not at the time of the MS-diagnosis. Time after first MS-symptom was subdivided according to diagnostic status (1st symptom, diagnosis), and years since first symptom and since diagnosis (<1, 1–3, 4–6, 7–9, 10+ years).

### Statistical Analysis

Log-linear Poisson regression analysis was used to compute incidence and mortality rate ratios (IRRs or MRRs) for MS diagnosis, MS debut and risk of death in MS patients among mobile phone subscription holders compared to non-subscribers. The analyses were adjusted for gender, age (in incidence analyses: 18–29, 30–39, 40–49 and 50–65 years; in mortality analyses: 18–29, 30–39, 40–49, 50–59, 60–69, 70–79 and 80+ years) and individual calendar year (1987 to 2004 by increments of 1 year). Subjects were allowed to change between categories of covariates and exposure variables over time. When analysing risk of death, years since diagnosis was included as a linear covariate.

The presenting symptoms of MS among subscribers and nonsubscribers were compared by analysing MS diagnoses with different initial symptoms as competing risks in a Poisson model as

above with independent gender, age and period dependency for each symptom.

For date variables with missing day values, the 15th of the respective month was used and when the month was missing, July 1st was used. As only the year of first symptom was available, the date of first symptom was set to July 1st of the given year or the actual date of diagnosis, whichever came first. The statistical analyses were performed in SAS 9.1.

## Results

The gender and age profile of new subscription holders changed dramatically over the course of the exposure (mobile phone subscription) period (Fig. 1). In 1990, 0.1% of all women and 1.9% of all men aged 18–65 years owned a subscription in their own name, with the highest proportion in middle-aged men. In 1995, 3.6% of all women had a subscription with penetration decreasing gradually above age 45 years. In men the penetration was above 20% from age 19 to 47 years, decreasing rapidly in the older ages.

### Risk of MS Among Subscription Holders

The 405 971 subscription holders accrued 4 063 040 years of follow up (mean 10.0 years; maximum 18.0 years). The overall risks of MS in subscription holding women and men were 1.02 (95% CI: 0.83–1.24) and 1.11 (95% CI: 0.98–1.26), respectively (Table 1). Stratification of subscription holders by years since first subscription showed a slight overall increase in IRR of MS among male subscribers of 10 to 20% in the period from 1–9 years after first subscription, however, there was no elevation in risk before or

after that interval. Among women, elevated IRRs were seen in the first year after subscription (1.61; 95% CI: 0.93–2.79,  $n = 13$ ) and beyond 10 years of subscription (2.08; 95% CI: 1.08–4.01,  $n = 9$ ), whereas the risk estimates were close to one in the intervening period. Further restricting the follow-up period to 13+ years showed an even higher estimate (IRR: 3.43, 95% CI: 0.86–13.72), however based on only two cases. In analysis of both genders, IRRs ranged from 1.04 to 1.09, except in the stratum of 13+ years of subscribing where there was a 26% increased risk of MS (95% CI 0.65–2.43).

Analysing until year of first symptom yielded similar results when comparing ever versus never subscribing. However, among men we observed a 33% increased risk of having the first symptom within one year of obtaining a subscription. In subsequent years there was little deviation from unity, except in the strata of 10+ years of usage where the risk was reduced by half but based on only two cases (IRR: 0.50, 95% CI 0.13–2.02). Among women, there was a 30% decreased risk in the first year after subscribing and the only estimate above one was for 10+ years of subscribing where there was a more than six fold increased risk, however based on only two cases.

### Presenting Symptoms

Presenting symptoms of MS differed significantly between subscribers and non-subscribers (Table 2) overall and among women, but not among men (respective p-values: 0.03, 0.02 and 0.46). When examining the individual symptoms, there was a slightly increased risk of diplopia (double vision) in both genders; with an IRR of 1.38 (95% CI: 1.02–1.86,  $n = 54$ ) in combined

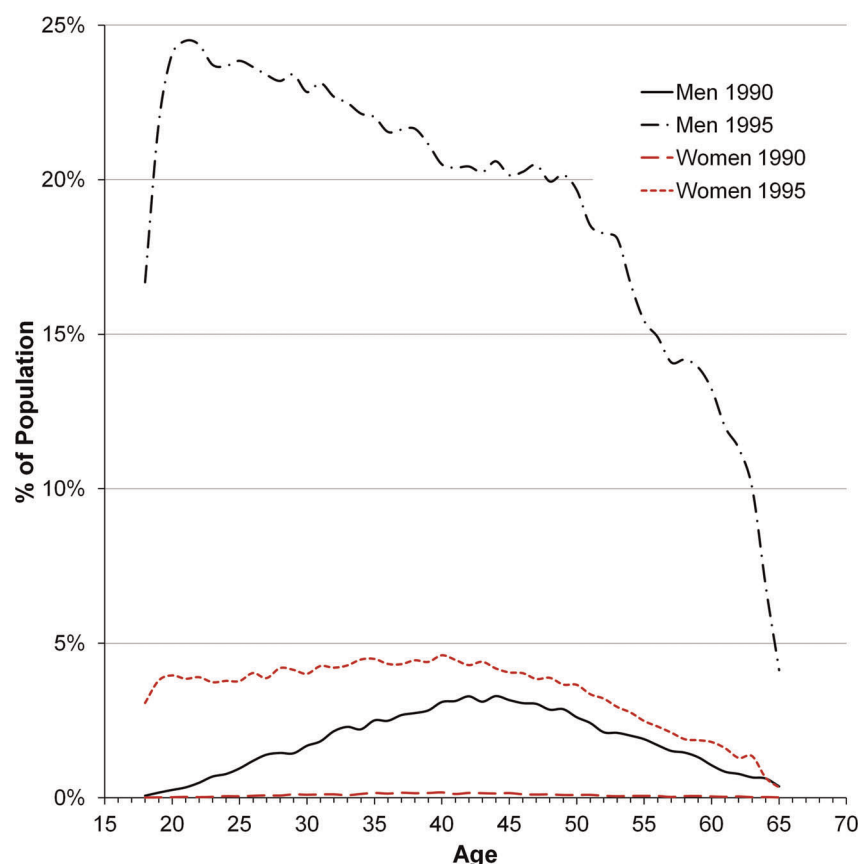

**Figure 1.** Mobile phone subscription penetration in the Danish population by age in 1990 and 1995. doi:10.1371/journal.pone.0034453.g001

**Table 1.** Adjusted rate ratios for Multiple Sclerosis among private subscribers to mobile phones in Denmark, 1987–1995, followed up through 2004.

|                              | Women        |       |                   | Men          |       |                  | Total        |       |                  |
|------------------------------|--------------|-------|-------------------|--------------|-------|------------------|--------------|-------|------------------|
|                              | Person years | MS    | IRR 95% CI        | Person years | MS    | IRR 95% CI       | Person years | MS    | IRR 95% CI       |
| <b>Until diagnosis</b>       |              |       |                   |              |       |                  |              |       |                  |
| <b>Non subscribers</b>       | 27 517 890   | 3 531 | Reference         | 25 309 803   | 1 517 | Reference        | 52 827 693   | 5 048 | Reference        |
| <b>Subscription holders</b>  | 572 177      | 102   | 1.02 (0.83–1.24)  | 3 490 862    | 304   | 1.11 (0.98–1.26) | 4 063 040    | 406   | 1.06 (0.96–1.18) |
| <b>Years of subscription</b> |              |       |                   |              |       |                  |              |       |                  |
| <1                           | 60 044       | 13    | 1.61 (0.93–2.79)  | 344 413      | 18    | 0.91 (0.57–1.46) | 404 457      | 31    | 1.09 (0.76–1.56) |
| 1–3                          | 176 918      | 26    | 1.00 (0.68–1.48)  | 1 012 944    | 70    | 1.12 (0.87–1.44) | 1 189 862    | 96    | 1.05 (0.85–1.29) |
| 4–6                          | 171 243      | 28    | 0.84 (0.58–1.22)  | 975 610      | 100   | 1.21 (0.98–1.50) | 1 146 853    | 128   | 1.08 (0.90–1.29) |
| 7–9                          | 139 559      | 26    | 0.91 (0.61–1.34)  | 840 374      | 91    | 1.11 (0.89–1.39) | 979 932      | 117   | 1.04 (0.86–1.26) |
| 10–12                        | 20 847       | 7     | 1.87 (0.89–3.94)  | 234 295      | 18    | 0.88 (0.55–1.41) | 255 142      | 25    | 1.04 (0.70–1.54) |
| 13+                          | 3 567        | 2     | 3.43 (0.86–13.72) | 83 227       | 7     | 1.02 (0.48–2.16) | 86 794       | 9     | 1.26 (0.65–2.43) |
| 10+                          | 24 414       | 9     | 2.08 (1.08–4.01)  | 317 522      | 25    | 0.92 (0.61–1.37) | 341 936      | 34    | 1.09 (0.77–1.53) |
| <b>Until 1st symptom</b>     |              |       |                   |              |       |                  |              |       |                  |
| <b>Non subscribers</b>       | 21 929 622   | 3 336 | Reference         | 20 599 730   | 1 485 | Reference        | 42 529 353   | 4 821 | Reference        |
| <b>Subscription holders</b>  | 351 972      | 57    | 0.94 (0.72–1.23)  | 2 261 285    | 195   | 1.10 (0.94–1.28) | 2 613 258    | 252   | 1.05 (0.92–1.19) |
| <b>Years of subscription</b> |              |       |                   |              |       |                  |              |       |                  |
| <1                           | 60 012       | 7     | 0.70 (0.33–1.48)  | 344 332      | 33    | 1.33 (0.94–1.90) | 404 344      | 40    | 1.11 (0.81–1.52) |
| 1–3                          | 176 836      | 30    | 0.98 (0.69–1.41)  | 1 012 638    | 84    | 1.06 (0.84–1.33) | 1 189 474    | 114   | 1.02 (0.84–1.24) |
| 4–6                          | 104 217      | 17    | 0.93 (0.58–1.51)  | 705 980      | 65    | 1.09 (0.84–1.41) | 810 197      | 82    | 1.06 (0.84–1.32) |
| 7–9                          | 8 703        | 1     | 0.73 (0.10–5.16)  | 138 245      | 11    | 1.06 (0.59–1.93) | 146 948      | 12    | 1.05 (0.60–1.86) |
| 10+                          | 2 204        | 2     | 6.75 (1.69–27.05) | 60 091       | 2     | 0.50 (0.13–2.02) | 62 295       | 4     | 0.99 (0.37–2.65) |

doi:10.1371/journal.pone.0034453.t001

analysis of men and women. Among women, there was also an increased risk of fatigue (IRR: 3.02, 95% CI: 1.45–6.28,  $n = 8$ ), and among men there was increased risk of optic neuritis (IRR: 1.38, 95% CI: 1.03–1.86,  $n = 58$ ).

#### Risk of Death Among MS-patients

The 717 subscription holding MS-patients accrued 4 934 years of exposed follow-up from 1987 onwards (mean: 6.9 years; maximum 18.0 years). The overall MRRs of death were 1.27 (95% CI: 0.77–2.09) and 0.79 (95% CI: 0.58–1.09) among female and

**Table 2.** Adjusted rate ratios for Multiple Sclerosis with different first symptoms among private subscribers to mobile phones in Denmark, 1987–1995, followed up through 2004.

|                         | Women           |               |                  | Men             |               |                  | Total           |               |                  |
|-------------------------|-----------------|---------------|------------------|-----------------|---------------|------------------|-----------------|---------------|------------------|
|                         | Unexposed cases | Exposed cases | IRR 95% CI       | Unexposed cases | Exposed cases | IRR 95% CI       | Unexposed cases | Exposed cases | IRR 95% CI       |
| Person years            | 27 517 890      | 572 177       |                  | 25 309 803      | 3 490 862     |                  | 52 827 693      | 4 063 040     |                  |
| Cerebellar symptoms     | 326             | 4             | 0.40 (0.15–1.08) | 138             | 21            | 0.81 (0.51–1.30) | 464             | 25            | 0.67 (0.44–1.01) |
| Diplopia                | 300             | 14            | 1.59 (0.92–2.72) | 157             | 40            | 1.32 (0.92–1.89) | 457             | 54            | 1.38 (1.02–1.86) |
| Optic neuritis          | 694             | 23            | 1.08 (0.71–1.64) | 217             | 58            | 1.38 (1.03–1.86) | 911             | 81            | 1.24 (0.97–1.57) |
| Pyramidal dysfunction   | 837             | 17            | 0.71 (0.44–1.15) | 452             | 80            | 1.00 (0.78–1.27) | 1 289           | 97            | 0.90 (0.73–1.12) |
| Sensory symptoms        | 1 836           | 50            | 0.92 (0.69–1.22) | 653             | 130           | 1.02 (0.84–1.24) | 2 489           | 180           | 0.98 (0.84–1.15) |
| Sphincter control       | 116             | 1             | 0.27 (0.04–1.97) | 63              | 15            | 1.20 (0.68–2.14) | 179             | 16            | 0.95 (0.56–1.61) |
| Vertigo                 | 226             | 8             | 0.95 (0.47–1.92) | 61              | 12            | 0.79 (0.43–1.47) | 287             | 20            | 0.85 (0.53–1.35) |
| Fatigue                 | 74              | 8             | 3.02 (1.45–6.28) | 40              | 11            | 1.09 (0.56–2.12) | 114             | 19            | 1.61 (0.96–2.69) |
| Other/Unstated symptoms | 355             | 8             | 1.28 (0.63–2.59) | 145             | 23            | 1.30 (0.82–2.06) | 500             | 31            | 1.30 (0.89–1.89) |

doi:10.1371/journal.pone.0034453.t002

male MS-patients, respectively, with a subscription (Table 3) compared to patients without subscription. In combined analysis of the two genders, the IRR was 0.91 (95% CI: 0.70–1.19). Among men, the risk of death was reduced by half or more in the first four years of exposed follow-up time, especially in the interval from 1–3 years after which the death risk estimates approached unity. Among women, the death estimates varied more, but did not deviate significantly from unity, except among female MS patients with 7–9 years of mobile phone usage after diagnosis (MRR, 2.44; 95% CI: 1.20–4.98;  $n=8$ ). The combined analysis of the two genders revealed a 40% decreased MRR in the first four years and a 41% increase seven to nine years after subscribing.

### Likelihood of Subscribing for a Mobile Phone Among MS Patients

The 5 050 MS patients accrued 29 993 person years from 1987 to 1995 (mean, 5.9 years; maximum 9.0 years). Among women, there was no increased likelihood of obtaining a subscription after first symptoms or in the first year after being diagnosed with MS (Table 4). Beyond that there was a tendency for an increased likelihood of obtaining a subscription (IRRs ranging from 1.18–1.44). Among men, there was no overall association with first symptoms or diagnosis of MS. However, in the first four years after getting the symptom, the IRRs were 25% elevated and beyond that they were around 20% decreased. Once diagnosed with MS, there was no apparent increased likelihood of acquiring a mobile phone subscription, except in the period 1–3 years after diagnosis (IRR: 1.22; 95% CI: 0.97–1.54). In combined analysis of the two genders, there was no indication of an increased likelihood of acquiring a subscription after first symptoms or diagnosis. Except for a 26% increased tendency for subscription 1–3 years after diagnosis (95% CI: 1.04–1.53), there was no apparent trends between first symptoms or MS diagnosis and mobile phone subscription in the combined analysis of the two genders.

### Discussion

In our population-based cohort study of mobile phone subscription holders, we found no overall increased risk of MS among subscription holders, irrespective of whether analyzed until clinical MS diagnosis or until first recorded symptom. Neither did we find any overall increased risk of death among subscription

holding MS-patients. Among subgroups of women, we did observe some risk increases of MS, MS-symptoms and death after long-term subscription, however, the numbers were small in these analyses and may have been chance findings. Among men, we found a tendency towards increased risks of MS-symptoms, in the first year after mobile phone subscription, and of MS in the period 1–9 years after first subscription. Among male MS patients, the risk of death appeared to be decreased in the first years of mobile phone exposure, approaching unity after 4 years. The first symptoms of MS were different among mobile phone users compared to non-subscribers, with subscription holders having more frequent fatigue among women, increased optic neuritis among men, and diplopia in both sexes.

### Risk of MS-diagnosis in Subscription Holders

Our observation of an increased risk of MS among men 1–9 years after first subscription could be due to reverse causation, particularly since men were somewhat more likely to obtain a subscription in the years immediately after being recorded with their first symptoms. However, as a large proportion of MS cases were diagnosed within the first few years after their first symptom, we would have expected to also see a risk increase in the first year after first subscription. We did observe slightly increased risk of first symptoms of MS within the first year after first subscription. This could be a triggering/promoting effect, but such effects would likely also affect women, contrary to our findings, and it therefore seems more likely a chance finding or detection bias related to use of the mobile phone. In addition, there is also the possibility of reverse causation, since only the year of first recorded symptom and not the actual date of first symptom experienced was available for most subjects, therefore the temporal resolution does not allow exact sequencing of events within the year of first symptom. This interpretation is supported by the fact that we observed both an increased chance of obtaining a subscription in the year of the first symptom and an increased risk of having a first symptom of future MS within the first year after first subscription. Among female mobile phone users, we observed a doubling in risk of MS 10 or more years after first subscription, however, this finding was based on very few cases, and the limited statistical precision in combination with lack of dose response and disagreement with the results in men suggests chance as a more likely explanation. The fact that the risk was also present when analysing until first

**Table 3.** Risk of death among Multiple Sclerosis patients with private subscriptions to mobile phones in Denmark. 1987–1995, followed up through 2004.

|                                                 | Women        |        |                  | Men          |        |                  | Total        |        |                  |
|-------------------------------------------------|--------------|--------|------------------|--------------|--------|------------------|--------------|--------|------------------|
|                                                 | Person years | Deaths | MRR 95% CI       | Person years | Deaths | MRR 95% CI       | Person years | Deaths | MRR 95% CI       |
| <b>Non subscribers</b>                          | 39 575       | 400    | Reference        | 18 333       | 306    | Reference        | 57 908       | 706    | Reference        |
| <b>Subscription holders</b>                     | 1 339        | 16     | 1.27 (0.77–2.09) | 3 595        | 45     | 0.79 (0.58–1.09) | 4 934        | 61     | 0.91 (0.70–1.19) |
| <b>Years of subscription after MS-diagnosis</b> |              |        |                  |              |        |                  |              |        |                  |
| <1                                              | 190          | 2      | 1.35 (0.33–5.45) | 509          | 2      | 0.40 (0.10–1.64) | 700          | 4      | 0.59 (0.22–1.59) |
| 1–3                                             | 487          | 4      | 1.06 (0.39–2.85) | 1 305        | 7      | 0.47 (0.22–1.00) | 1 792        | 11     | 0.58 (0.32–1.06) |
| 4–6                                             | 382          | 2      | 0.57 (0.14–2.00) | 934          | 14     | 0.91 (0.53–1.57) | 1 317        | 16     | 0.90 (0.54–1.48) |
| 7–9                                             | 246          | 8      | 2.44 (1.20–4.98) | 645          | 16     | 1.06 (0.63–1.78) | 891          | 24     | 1.41 (0.93–2.15) |
| 10+                                             | 33           | 0      | –                | 202          | 6      | 0.93 (0.41–2.12) | 235          | 6      | 0.95 (0.42–2.15) |

doi:10.1371/journal.pone.0034453.t003

**Table 4.** Likelihood of getting subscription after diagnosis or first symptoms of Multiple Sclerosis among private subscribers to mobile phones in Denmark, 1987–1995.

|                                                         | Women        |           |                  | Men          |           |                  | Total        |           |                  |
|---------------------------------------------------------|--------------|-----------|------------------|--------------|-----------|------------------|--------------|-----------|------------------|
|                                                         | Person years | Subscript | IRR 95% CI       | Person years | Subscript | IRR 95% CI       | Person years | Subscript | IRR 95% CI       |
| <b>Non- MS</b>                                          | 14 376 975   | 60 019    | Reference        | 14 188 947   | 338 243   | Reference        | 28 565 922   | 398 262   | Reference        |
| <b>Diagnostic stage</b>                                 |              |           |                  |              |           |                  |              |           |                  |
| Symptoms                                                | 8 604        | 41        | 1.00 (0.73–1.35) | 3 857        | 97        | 1.04 (0.85–1.27) | 12 461       | 138       | 1.04 (0.88–1.22) |
| Diagnosis                                               | 11 172       | 86        | 1.22 (0.99–1.51) | 6 360        | 193       | 1.00 (0.87–1.15) | 17 532       | 279       | 1.07 (0.95–1.21) |
| <b>Years since 1st MS-symptom (Censor at diagnosis)</b> |              |           |                  |              |           |                  |              |           |                  |
| <1                                                      | 1 581        | 7         | 1.00 (0.48–2.10) | 742          | 21        | 1.24 (0.81–1.90) | 2 323        | 28        | 1.17 (0.81–1.69) |
| 1–3                                                     | 3 168        | 8         | 0.61 (0.31–1.23) | 1 512        | 40        | 1.25 (0.92–1.71) | 4 680        | 48        | 1.07 (0.80–1.42) |
| 4–6                                                     | 2 052        | 12        | 1.31 (0.74–2.30) | 874          | 17        | 0.85 (0.53–1.36) | 2 926        | 29        | 1.00 (0.69–1.43) |
| 7–9                                                     | 1 190        | 6         | 0.96 (0.43–2.14) | 501          | 11        | 0.78 (0.43–1.40) | 1 692        | 17        | 0.84 (0.52–1.35) |
| 10+                                                     | 612          | 8         | 1.41 (0.70–2.81) | 228          | 8         | 0.82 (0.41–1.64) | 840          | 16        | 1.07 (0.65–1.74) |
| <b>Years since MS-diagnosis</b>                         |              |           |                  |              |           |                  |              |           |                  |
| <1                                                      | 1 629        | 6         | 0.67 (0.30–1.50) | 865          | 24        | 1.02 (0.69–1.52) | 2 494        | 30        | 0.93 (0.65–1.33) |
| 1–3                                                     | 4 068        | 31        | 1.31 (0.92–1.87) | 2 252        | 72        | 1.22 (0.97–1.54) | 6 320        | 103       | 1.26 (1.04–1.53) |
| 4–6                                                     | 2 849        | 23        | 1.44 (0.96–2.17) | 1 735        | 48        | 0.96 (0.72–1.28) | 4 584        | 71        | 1.08 (0.86–1.37) |
| 7–9                                                     | 1 735        | 14        | 1.18 (0.70–2.00) | 1 010        | 32        | 0.94 (0.67–1.33) | 2 745        | 46        | 1.02 (0.76–1.36) |
| 10+                                                     | 891          | 12        | 1.20 (0.68–2.11) | 498          | 17        | 0.64 (0.40–1.04) | 1 389        | 29        | 0.81 (0.56–1.17) |

doi:10.1371/journal.pone.0034453.t004

symptom and that the risk was even more pronounced when the follow-up period was restricted to 13+ years may, however, merit further attention. It should also be kept in mind that the first female users who were the most likely long term exposed subjects were a select subgroup of presumably affluent women, and therefore confounding may also have influenced the results.

### Debut Symptoms

Fatigue was more frequent among female mobile phone subscribers, but not among men. Although tiredness/fatigue is among the more common complaints in mobile users [25,26], and there is some evidence that RF-EMF from mobile phones influences EEG [27], the lack of consistency in results between genders and the small numbers do not allow firm conclusions based on our data. We observed an increased risk of optic neuritis among male subscribers and diplopia (double vision) was elevated in both genders. A recent laboratory study found no effect on visually evoked potentials in GSM exposed men [28], but effects of short term exposure in a laboratory may differ from effects due to long term exposure. Several small questionnaire-based cross-sectional studies have reported an increased occurrence of blurring of vision (among the symptoms of both optic neuritis and diplopia) among mobile phone users, although the impact of participation and reporting biases should be considered in the interpretation of these studies [29–32]. Also, self-reported “blurring of vision” is a very vague endpoint, compared to the MS-registry which contains, thoroughly validated, records of symptoms persisting for longer periods. Although the overall composition of symptoms in our study did not differ significantly by exposure status for men, the uniformly increased risk in both genders for diplopia indicates that these observations merit further study. If future studies corroborate that the symptom picture differs, it should be considered that the visual nerve may be in the exposure field, but also that the battery in mobile phones heats up when the

phone is in operation and that heating may elicit symptoms in MS-patients [33,34].

### Risk of Death in MS-patients

We did not observe an increased risk of death in MS cases following mobile subscription, rather, among men, there was a tendency for a decreased risk of death in the first years after obtaining a subscription. These estimates were, however, based on small numbers, and the risk decrease among men is likely attributable to chance. It is, however, conceivable that there is a healthy subscriber bias at the time of mobile phone acquisition as its use requires the physical and cognitive capabilities to operate the mobile phone as well as spending enough time away from a landline phone to justify the extra expense. The numbers of deaths among female MS patients with mobile phone subscription were too small to allow any conclusions.

### Likelihood of Subscribing for a Mobile Phone in MS Patients

It is a general epidemiological concern that early symptoms of the outcome of interest may have a reverse effect on the likelihood of exposure and thereby make it difficult to discern cause and effect. For instance, migraine-like symptoms are more common in MS-patients [35], and the Danish Migraine Association has been advising migraine patients to obtain a mobile phone to facilitate access to help in case of an attack. For women in our study, the likelihood of obtaining a subscription was only increased more than one year after being diagnosed with MS, indicating that for women the disease may indeed influence the likelihood of getting a subscription but only during a period of little impact on the risk analyses. Among men, there was no effect of being diagnosed with MS on the likelihood of obtaining a subscription; there was, however, some indication of an increased likelihood of getting a subscription in the first four years after being diagnosed with the

first symptoms of MS. This means that, among men, reverse causation bias is a potential problem in our analyses, especially since the effect may be present even before the year of the first recorded symptoms, if prodromal symptoms exist. Data on this issue were, however, sparse and the effect estimates did not reach significance. It is therefore not possible to substantiate if the observed associations are chance findings or true associations applicable to other studies.

## Strengths and Limitations

Our study was a nationwide cohort study based on objective and prospectively registered exposure data with validated and carefully evaluated outcome data from a nationwide high quality register [18]. The applied register approach practically eliminates loss to follow-up and provides accurate and virtually complete nationwide ascertainment of MS-cases. The validated diagnoses in the MS-register allowed more reliable estimates than in the previous publication of the same exposure cohort where MS was assessed from hospital admissions [15]. In addition, the details on type and date of early symptoms of MS from the MS-registry also allowed us to explore if mobile usage had any impact on the symptom pattern or course of the disease, although we only had the year of first symptom as recorded retrospectively from medical journals and not the actual date of the first symptoms experienced. Furthermore, the exposure assessment was improved in our study by left-truncating exposure data to 1987, thereby reducing misclassification of exposure due to car phones that were available in Denmark since 1982, but in terms of exposure to the head are several orders of magnitude lower than handheld phones.

A limitation of the study was the lack of exposure details and potential exposure misclassification [36]. Subscription holders not using their mobile phone may erroneously be classified as exposed or vice versa. However, according to the annual report of the Danish national IT and Telecom Agency, the average annual outgoing traffic per subscription was around 1400 min/subscription until 1992 when it started to decrease, stabilizing at around 900 min/subscription from 1995 to 2002 [37]. This change presumably reflects that the very early users had sufficient

need of the mobile phone to justify the expensive subscription. When examining risk at 10+ or even 13+ years of follow-up, where the exposure contrast was the largest, we found no increased risks of MS, MS-symptoms or death among men. Among women, however, we did see indications of increased risks for the various outcomes among long-term subscribers, although the numbers were too small to allow reliable interpretation. For several outcomes, we observed somewhat different associations among men and women. Although we cannot rule out gender differences, differences in residual confounding seem more likely given the fact that the uptake of mobile phones was so different, in time and potentially in reasons, combined with the established gender difference in MS incidence [38].

## Conclusions

We found little evidence for an association between mobile phone use and risk of MS or of death in MS patients in this nationwide study of mobile phone subscribers in Denmark. We did, however, observe an increased risk of both MS symptoms and diagnosis among long-term female subscribers, although this was based on small numbers. The presenting symptoms of MS differed between subscribers and nonsubscribers with elevated risks for symptoms previously suggested to be associated with mobile phone use (visual disturbances and fatigue) observed among the mobile phone users. These observations merit further attention in more detailed studies, such as the ongoing prospective COSMOS study [39], which will allow more detailed exposure assessment, collecting information on potential confounders and detailed chronological information to identify potential reverse causation bias.

## Author Contributions

Conceived and designed the experiments: AHP JS ES. Performed the experiments: AHP. Analyzed the data: AHP. Contributed reagents/materials/analysis tools: ES CJ JB. Wrote the paper: AHP ES JB CJ SF JS. Supervised AHP perform the experiments and analyze the data: JS SF.

## References

- Cardis E, Deltour I, Mann S, Moissonnier M, Taki M, et al. (2008) Distribution of RF energy emitted by mobile phones in anatomical structures of the brain. *Phys Med Biol* 53: 2771–2783.
- Dimbylow PJ, Mann SM (1994) SAR calculations in an anatomically realistic model of the head for mobile communication transceivers at 900 MHz and 1.8 GHz. *Phys Med Biol* 39: 1537–1553.
- Baan R, Grosse Y, Lauby-Secretan B, El GF, Bouvard V, et al. (2011) Carcinogenicity of radiofrequency electromagnetic fields. *Lancet Oncol* 12: 624–626.
- Bronnum-Hansen H, Koch-Henriksen N, Stenager E (2004) Trends in survival and cause of death in Danish patients with multiple sclerosis. *Brain* 127: 844–850.
- Noseworthy JH, Lucchinetti C, Rodriguez M, Weinshenker BG (2000) Multiple sclerosis. *N Engl J Med* 343: 938–952.
- Bentzen J, Flachs EM, Stenager E, Bronnum-Hansen H, Koch-Henriksen N (2010) Prevalence of multiple sclerosis in Denmark 1950–2005. *Mult Scler* 16: 520–525.
- Nitby H, Brun A, Eberhardt J, Malmgren L, Persson BR, et al. (2009) Increased blood-brain barrier permeability in mammalian brain 7 days after exposure to the radiation from a GSM-900 mobile phone. *Pathophysiology* 16: 103–112.
- Nitby H, Grafstrom G, Eberhardt JL, Malmgren L, Brun A, et al. (2008) Radiofrequency and extremely low-frequency electromagnetic field effects on the blood-brain barrier. *Electromagn Biol Med* 27: 103–126.
- Eberhardt JL, Persson BR, Brun AE, Salford LG, Malmgren LO (2008) Blood-brain barrier permeability and nerve cell damage in rat brain 14 and 28 days after exposure to microwaves from GSM mobile phones. *Electromagn Biol Med* 27: 215–229.
- Salford LG, Brun A, Stureson K, Eberhardt JL, Persson BR (1994) Permeability of the blood-brain barrier induced by 915 MHz electromagnetic radiation, continuous wave and modulated at 8, 16, 50, and 200 Hz. *Microsc Res Tech* 27: 535–542.
- Stam R (2010) Electromagnetic fields and the blood-brain barrier. *Brain Res Rev* 65: 80–97.
- McQuade JM, Merritt JH, Miller SA, Scholin T, Cook MC, et al. (2009) Radiofrequency-radiation exposure does not induce detectable leakage of albumin across the blood-brain barrier. *Radiat Res* 171: 615–621.
- de Gannes FP, Billaudel B, Taxile M, Haro E, Ruffie G, et al. (2009) Effects of head-only exposure of rats to GSM-900 on blood-brain barrier permeability and neuronal degeneration. *Radiat Res* 172: 359–367.
- Masuda H, Ushiyama A, Takahashi M, Wang J, Fujiwara O, et al. (2009) Effects of 915 MHz electromagnetic-field radiation in TEM cell on the blood-brain barrier and neurons in the rat brain. *Radiat Res* 172: 66–73.
- Schüz J, Waldemar G, Olsen JH, Johansen C (2009) Risks for central nervous system diseases among mobile phone subscribers: a Danish retrospective cohort study. *PLoS ONE* 4: e4389.
- Lynge E, Sandegaard JL, Rebolj M (2011) The Danish National Patient Register. *Scand J Public Health* 39: 30–33.
- Mason K, Thygesen LC, Stenager E, Bronnum-Hansen H, Koch-Henriksen N (2011) Evaluating the use and limitations of the Danish National Patient Register in register-based research using an example of multiple sclerosis. *Acta Neurol Scand*.
- Bronnum-Hansen H, Koch-Henriksen N, Stenager E (2011) The Danish multiple sclerosis registry. *Scand J Public Health* 39: 62–64.
- Pedersen CB (2011) The Danish Civil Registration System. *Scand J Public Health* 39: 22–25.
- Koch-Henriksen N, Rasmussen S, Stenager E, Madsen M (2001) The Danish Multiple Sclerosis Registry. History, data collection and validity. *Dan Med Bull* 48: 91–94.
- Poser CM, Paty DW, Scheinberg L, McDonald WI, Davis FA, et al. (1983) New diagnostic criteria for multiple sclerosis: guidelines for research protocols. *Ann Neurol* 13: 227–231.

22. Schüz J, Jacobsen R, Olsen JH, Boice JD Jr., McLaughlin JK, et al. (2006) Cellular telephone use and cancer risk: update of a nationwide Danish cohort. *J Natl Cancer Inst* 98: 1707–1713.
23. Johansen C, Boice J Jr., McLaughlin J, Olsen J (2001) Cellular telephones and cancer—a nationwide cohort study in Denmark. *J Natl Cancer Inst* 93: 203–207.
24. Frei P, Poulsen AH, Johansen C, Olsen JH, Steding-Jessen, et al. (2011) Use of mobile phones and risk of brain tumours: update of Danish cohort study. *BMJ* 343: d6387.
25. Schreier N, Huss A, Roosli M (2006) The prevalence of symptoms attributed to electromagnetic field exposure: a cross-sectional representative survey in Switzerland. *Soz Präventivmed* 51: 202–209.
26. Huss A, Roosli M (2006) Consultations in primary care for symptoms attributed to electromagnetic fields—a survey among general practitioners. *BMC Public Health* 6: 267.
27. van Rongen E, Croft R, Juutilainen J, Lagroye I, Miyakoshi J, et al. (2009) Effects of radiofrequency electromagnetic fields on the human nervous system. *J Toxicol Environ Health B Crit Rev* 12: 572–597.
28. Kleinlogel H, Dierks T, Koenig T, Lehmann H, Minder A, et al. (2008) Effects of weak mobile phone - electromagnetic fields (GSM, UMTS) on event related potentials and cognitive functions. *Bioelectromagnetics* 29: 488–497.
29. Meo SA, Al-Drees AM (2005) Mobile phone related-hazards and subjective hearing and vision symptoms in the Saudi population. *Int J Occup Med Environ Health* 18: 53–57.
30. Balik HH, Turgut-Balik D, Balicki K, Ozcan IC (2005) Some ocular symptoms and sensations experienced by long term users of mobile phones. *Pathol Biol (Paris)* 53: 88–91.
31. Kucer N (2008) Some ocular symptoms experienced by users of mobile phones. *Electromagn Biol Med* 27: 205–209.
32. Chia SE, Chia HP, Tan JS (2000) Prevalence of headache among handheld cellular telephone users in Singapore: a community study. *Environ Health Perspect* 108: 1059–1062.
33. Guthrie TC, Nelson DA (1995) Influence of temperature changes on multiple sclerosis: critical review of mechanisms and research potential. *J Neurol Sci* 129: 1–8.
34. Davis SL, Wilson TE, White AT, Frohman EM (2010) Thermoregulation in multiple sclerosis. *J Appl Physiol* 109: 1531–1537.
35. Kister I, Caminero AB, Herbert J, Lipton RB (2010) Tension-type headache and migraine in multiple sclerosis. *Curr Pain Headache Rep* 14: 441–448.
36. Schüz J, Johansen C (2007) A comparison of self-reported cellular telephone use with subscriber data: agreement between the two methods and implications for risk estimation. *Bioelectromagnetics* 28: 130–136.
37. National IT and Telecom Agency D (2003) *Tele Yearbook – 2002*.
38. Greer JM, McCombe PA (2011) Role of gender in multiple sclerosis: clinical effects and potential molecular mechanisms. *J Neuroimmunol* 234: 7–18.
39. Schüz J, Elliott P, Auvinen A, Kromhout H, Poulsen AH, et al. (2010) An international prospective cohort study of mobile phone users and health (Cosmos): Design considerations and enrolment. *Cancer Epidemiol.*
